# Supplementary material
Source: PubMed Central journal article supplement (PMC2849899)
Supplement: NIHMS179533-supplement-1_si_001.pdf [file NIHMS179533-supplement-1_si_001.pdf]

## Figure Captions

- **Figure S1. Antigen Identification for mAb #3.** Reduced SDS-PAGE of an affinity purified mixture (~ 300 ng) from IgG- and albumin- depleted lung cancer plasma, stained with silver nitrate (A). The protein with a MW of ~ 140 kDa was recognized by the mAb (B) and was identified as complement factor H by LC-ESI-MS (C).
- **Figure S2. PNGase F Treatment of Hpt under Native Conditions and Western Blotting Using mAb #1.** (A) Deglycosylation of Hpt under native conditions. Lane 1, control; Lane 2, 2-day incubation; Lane 3, 3-day incubation; Lane 4, 4-day incubation. (B) Western blotting of deglycosylated Hpt with mAb #1. Lane 1, control; Lane 2, Hpt after 4-day incubation.

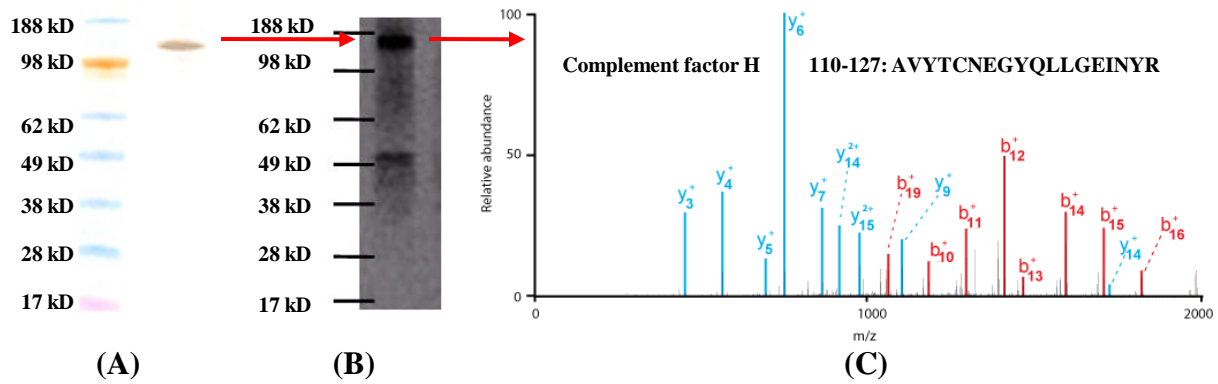

**Figure S1**

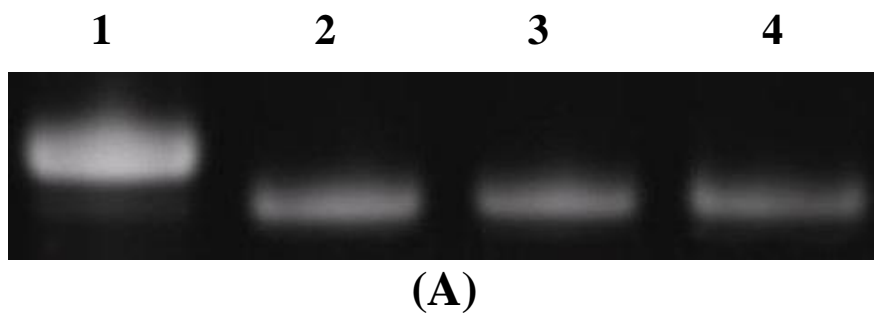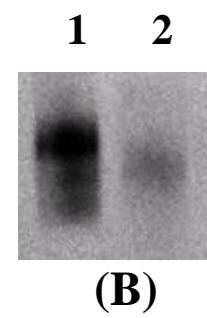

**Figure S2**
